# Supplementary material for: Mastication, swallowing, and salivary flow in patients with head and neck cancer: objective tests versus patient-reported outcomes
Source: Springer Nature journal article supplement (doi:10.1007/s00520-021-06368-6), 2021-06-25
Supplement: MOESM1 [file 19293426]

## Supplementary material

### **Mastication, swallowing and salivary flow in patients with head and neck cancer; objective tests versus patient reported outcomes**

*Supportive care in cancer*

Jorine A. Vermaire, MSc, Cornelis P.J. Raaijmakers, MSc, PhD, Irma M. Verdonck-de Leeuw, MSc, PhD, Femke Jansen, PhD, C. René Leemans, MD, PhD, Chris H.J. Terhaard, MD, PhD, Caroline M. Speksnijder, PT, MSc, PhD<sup>1</sup>

1. *Department of Oral and Maxillofacial Surgery and Special Dental Care*

*University Medical Center Utrecht, G05.122*

*P.O. Box 85.500*

*3508 GA Utrecht*

*The Netherlands*

*e-mail: [C.M.Speksnijder@umcutrecht.nl](mailto:C.M.Speksnijder@umcutrecht.nl)*

**Appendix 1.** Spearman correlation coefficients of the MAT versus the EORTC QLQ-H&N35

| <b>MAT</b><br><b>EORTC QLQ-H&amp;N35</b> | <b>M0</b><br><b>(N=101)</b> |                | <b>M3</b><br><b>(N=92)</b> |                | <b>M6</b><br><b>(N=92)</b> |                |
|------------------------------------------|-----------------------------|----------------|----------------------------|----------------|----------------------------|----------------|
|                                          | <i>Spearman's ρ</i>         | <i>p-value</i> | <i>Spearman's ρ</i>        | <i>p-value</i> | <i>Spearman's ρ</i>        | <i>p-value</i> |
| Pain in mouth                            | 0.082                       | 0.417          | 0.066                      | 0.541          | -0.014                     | 0.896          |
| Swallowing                               | 0.103                       | 0.312          | 0.123                      | 0.253          | 0.245                      | 0.018*         |
| Senses problems                          | 0.120                       | 0.238          | 0.198                      | 0.065          | 0.101                      | 0.337          |
| Speech problems                          | 0.009                       | 0.929          | 0.200                      | 0.062          | 0.156                      | 0.135          |
| Trouble with social eating               | 0.141                       | 0.166          | 0.276                      | 0.009*         | 0.201                      | 0.054          |
| Trouble with social contact              | 0.029                       | 0.778          | 0.295                      | 0.005*         | 0.209                      | 0.045*         |
| Less sexuality                           | -0.048                      | 0.642          | 0.084                      | 0.447          | 0.187                      | 0.078          |
| Teeth                                    | -0.004                      | 0.972          | 0.097                      | 0.368          | 0.106                      | 0.313          |
| Opening mouth                            | 0.026                       | 0.803          | 0.211                      | 0.048*         | -0.028                     | 0.792          |
| Dry mouth                                | -0.035                      | 0.734          | -0.032                     | 0.766          | -0.122                     | 0.243          |
| Sticky saliva                            | -0.053                      | 0.605          | -0.001                     | 0.995          | -0.073                     | 0.487          |
| Coughing                                 | 0.102                       | 0.317          | 0.186                      | 0.083          | 0.143                      | 0.171          |
| Feeling ill                              | 0.013                       | 0.903          | 0.113                      | 0.296          | 0.104                      | 0.324          |
| Pain killers                             | 0.135                       | 0.186          | 0.068                      | 0.530          | 0.069                      | 0.510          |
| Nutritional supplements                  | 0.163                       | 0.109          | 0.214                      | 0.045*         | 0.089                      | 0.395          |
| Feeding tube                             | -0.102                      | 0.319          | 0.146                      | 0.173          | -0.040                     | 0.703          |
| Weight loss                              | -0.119                      | 0.247          | -0.004                     | 0.968          | -0.009                     | 0.936          |
| Weight gain                              | 0.058                       | 0.571          | 0.004                      | 0.970          | 0.086                      | 0.412          |

\*: $p \leq 0.05$ ; M0: before treatment, M3: 3 months after treatment, M6: 6 months after treatment

**Appendix 2.** Spearman correlation coefficients of the MAT versus the SWAL-QoL-NL

| MAT<br>SWAL-QoL-NL | M0<br>(N=101)       |                | M3<br>(N=92)        |                | M6<br>(N=92)        |                |
|--------------------|---------------------|----------------|---------------------|----------------|---------------------|----------------|
|                    | <i>Spearman's ρ</i> | <i>p-value</i> | <i>Spearman's ρ</i> | <i>p-value</i> | <i>Spearman's ρ</i> | <i>p-value</i> |
| General burden     | 0.264               | 0.010*         | 0.032               | 0.767          | 0.150               | 0.151          |
| Food selection     | 0.347               | 0.001*         | 0.227               | 0.034*         | 0.232               | 0.026*         |
| Eating duration    | 0.361               | <0.001*        | 0.154               | 0.152          | 0.185               | 0.078          |
| Eating desire      | 0.167               | 0.105          | 0.014               | 0.900          | 0.211               | 0.043*         |
| Fear of eating     | 0.336               | 0.001*         | 0.172               | 0.108          | 0.163               | 0.119          |
| Mental health      | 0.323               | 0.001*         | 0.112               | 0.299          | 0.204               | 0.051          |
| Social functioning | 0.247               | 0.016*         | 0.225               | 0.035*         | 0.202               | 0.052          |
| Symptoms           | 0.385               | <0.001*        | 0.239               | 0.025*         | 0.292               | 0.005*         |
| <b>Total score</b> | 0.310               | 0.002*         | 0.165               | 0.124          | 0.222               | 0.033*         |

\*:p≤0.05; M0: before treatment, M3: 3 months after treatment, M6: 6 months after treatment

**Appendix 3.** Spearman correlation coefficients of the MAT versus the GRIX

| <b>MAT<br/>GRIX</b>         | <b>M0<br/>(N=93)</b> |                | <b>M3<br/>(N=82)</b> |                | <b>M6<br/>(N=89)</b> |                |
|-----------------------------|----------------------|----------------|----------------------|----------------|----------------------|----------------|
|                             | <i>Spearman's ρ</i>  | <i>p-value</i> | <i>Spearman's ρ</i>  | <i>p-value</i> | <i>Spearman's ρ</i>  | <i>p-value</i> |
| Xerostomia during day       | 0.008                | 0.936          | -0.022               | 0.843          | -0.065               | 0.548          |
| Xerostomia during night     | 0.126                | 0.223          | 0.041                | 0.705          | 0.091                | 0.386          |
| Xerostomia total score      | 0.089                | 0.398          | 0.007                | 0.949          | 0.026                | 0.809          |
| Sticky saliva during day    | 0.260                | 0.010*         | -0.104               | 0.339          | 0.006                | 0.959          |
| Sticky saliva during night  | 0.244                | 0.016*         | -0.038               | 0.729          | 0.007                | 0.947          |
| Sticking saliva total score | 0.301                | 0.003*         | -0.093               | 0.392          | 0.008                | 0.943          |

\* $p \leq 0.05$ ; M0: before treatment, M3: 3 months after treatment, M6: 6 months after treatment

**Appendix 4.** Spearman correlation coefficients of the WST versus the EORTC QLQ-H&N35

| WST                         | Number of swallows |         |                   |         |                   |         | Duration          |         |                   |         |                   |         |
|-----------------------------|--------------------|---------|-------------------|---------|-------------------|---------|-------------------|---------|-------------------|---------|-------------------|---------|
|                             | M0<br>(N=101)      |         | M3<br>(N=92)      |         | M6<br>(N=92)      |         | M0<br>(N=101)     |         | M3<br>(N=92)      |         | M6<br>(N=92)      |         |
| EORTC QLQ-H&N35             | Spearman's $\rho$  | p-value | Spearman's $\rho$ | p-value | Spearman's $\rho$ | p-value | Spearman's $\rho$ | p-value | Spearman's $\rho$ | p-value | Spearman's $\rho$ | p-value |
| Pain in mouth               | 0.088              | 0.378   | 0.175             | 0.094   | -0.009            | 0.936   | 0.125             | 0.205   | 0.253             | 0.015*  | -0.075            | 0.479   |
| Swallowing                  | 0.145              | 0.145   | 0.201             | 0.055   | 0.110             | 0.295   | 0.172             | 0.082   | 0.260             | 0.012*  | 0.176             | 0.094   |
| Senses problems             | 0.056              | 0.575   | 0.055             | 0.601   | -0.030            | 0.774   | 0.064             | 0.523   | 0.177             | 0.091   | 0.051             | 0.629   |
| Speech problems             | -0.043             | 0.667   | 0.173             | 0.099   | 0.110             | 0.295   | 0.070             | 0.482   | 0.291             | 0.005*  | 0.187             | 0.074   |
| Trouble with social eating  | 0.126              | 0.206   | 0.113             | 0.285   | 0.279             | 0.007*  | 0.178             | 0.072   | 0.277             | 0.008*  | 0.302             | 0.003*  |
| Trouble with social contact | 0.050              | 0.615   | 0.135             | 0.201   | 0.156             | 0.138   | 0.104             | 0.297   | 0.274             | 0.008*  | 0.196             | 0.062   |
| Less sexuality              | 0.152              | 0.128   | -0.003            | 0.981   | -0.017            | 0.877   | 0.166             | 0.096   | -0.022            | 0.837   | 0.106             | 0.322   |
| Teeth                       | -0.072             | 0.472   | -0.013            | 0.903   | 0.024             | 0.819   | 0.015             | 0.883   | 0.085             | 0.421   | 0.098             | 0.359   |
| Opening mouth               | 0.114              | 0.253   | 0.067             | 0.525   | 0.073             | 0.489   | 0.004             | 0.964   | 0.163             | 0.121   | -0.047            | 0.656   |
| Dry mouth                   | 0.052              | 0.603   | 0.053             | 0.616   | -0.085            | 0.422   | 0.013             | 0.897   | 0.177             | 0.091   | -0.022            | 0.832   |
| Sticky saliva               | -0.121             | 0.227   | 0.107             | 0.308   | -0.037            | 0.724   | 0.015             | 0.879   | 0.238             | 0.022*  | 0.077             | 0.467   |
| Coughing                    | -0.018             | 0.859   | 0.035             | 0.741   | -0.056            | 0.595   | 0.090             | 0.364   | 0.092             | 0.385   | 0.018             | 0.866   |
| Feeling ill                 | 0.082              | 0.413   | 0.169             | 0.108   | 0.161             | 0.127   | 0.029             | 0.775   | 0.282             | 0.007*  | 0.112             | 0.291   |
| Pain killers                | 0.003              | 0.975   | 0.037             | 0.728   | -0.109            | 0.303   | 0.047             | 0.637   | 0.020             | 0.847   | -0.087            | 0.408   |
| Nutritional supplements     | 0.052              | 0.607   | 0.086             | 0.417   | 0.156             | 0.137   | 0.093             | 0.348   | 0.192             | 0.067   | 0.151             | 0.150   |
| Feeding tube                | -0.106             | 0.289   | -0.044            | 0.680   | 0.144             | 0.172   | -0.073            | 0.461   | 0.030             | 0.775   | 0.117             | 0.266   |
| Weight loss                 | -0.120             | 0.234   | 0.043             | 0.683   | 0.004             | 0.973   | -0.024            | 0.810   | 0.053             | 0.618   | 0.031             | 0.773   |
| Weight gain                 | -0.087             | 0.388   | -0.170            | 0.108   | 0.108             | 0.306   | -0.103            | 0.303   | 0.065             | 0.539   | 0.030             | 0.777   |

\*:p≤0.05; M0: before treatment, M3: 3 months after treatment, M6: 6 months after treatment

**Appendix 5.** Spearman correlation coefficients of the WST versus the SWAL-QoL-NL

| WST                | Number of swallows |         |                   |         |                   |         | Duration          |         |                   |         |                   |         |
|--------------------|--------------------|---------|-------------------|---------|-------------------|---------|-------------------|---------|-------------------|---------|-------------------|---------|
|                    | M0<br>(N=101)      |         | M3<br>(N=92)      |         | M6<br>(N=92)      |         | M0<br>(N=101)     |         | M3<br>(N=92)      |         | M6<br>(N=92)      |         |
| SWAL-QoL-NL        | Spearman's $\rho$  | p-value | Spearman's $\rho$ | p-value | Spearman's $\rho$ | p-value | Spearman's $\rho$ | p-value | Spearman's $\rho$ | p-value | Spearman's $\rho$ | p-value |
| General burden     | 0.175              | 0.084   | 0.156             | 0.135   | 0.083             | 0.430   | 0.026             | 0.806   | 0.205             | 0.049*  | 0.162             | 0.123   |
| Food selection     | 0.106              | 0.292   | 0.226             | 0.029*  | 0.244             | 0.020*  | 0.110             | 0.299   | 0.332             | 0.001*  | 0.265             | 0.011*  |
| Eating duration    | 0.172              | 0.087   | 0.204             | 0.051   | 0.336             | 0.001*  | 0.222             | 0.034*  | 0.315             | 0.002*  | 0.364             | <0.001* |
| Eating desire      | 0.024              | 0.814   | 0.140             | 0.183   | 0.282             | 0.006*  | 0.171             | 0.104   | 0.322             | 0.002*  | 0.338             | 0.001*  |
| Fear of eating     | 0.222              | 0.026*  | 0.217             | 0.038*  | 0.281             | 0.007*  | 0.210             | 0.044*  | 0.316             | 0.002*  | 0.399             | <0.001* |
| Mental health      | 0.123              | 0.226   | 0.196             | 0.061   | 0.242             | 0.021*  | 0.143             | 0.175   | 0.211             | 0.044*  | 0.296             | 0.004*  |
| Social functioning | 0.159              | 0.118   | 0.214             | 0.041*  | 0.231             | 0.027*  | 0.106             | 0.314   | 0.280             | 0.007*  | 0.254             | 0.014*  |
| Symptoms           | 0.248              | 0.013*  | 0.172             | 0.101   | 0.142             | 0.179   | 0.138             | 0.193   | 0.268             | 0.010*  | 0.255             | 0.015*  |
| Total score        | 0.201              | 0.046*  | 0.238             | 0.023*  | 0.335             | 0.001*  | 0.194             | 0.064   | 0.353             | 0.001*  | 0.398             | <0.001* |

\*:p $\leq$ 0.05; M0: before treatment, M3: 3 months after treatment, M6: 6 months after treatment

**Appendix 6.** Spearman correlation coefficients of the WST versus the GRIX

| WST                         | <i>Number of swallows</i>   |                           |                             |                           |                             |                           | <i>Duration</i>             |                           |                             |                           |                             |                           |
|-----------------------------|-----------------------------|---------------------------|-----------------------------|---------------------------|-----------------------------|---------------------------|-----------------------------|---------------------------|-----------------------------|---------------------------|-----------------------------|---------------------------|
|                             | <i>M0</i><br><i>(N=97)</i>  |                           | <i>M3</i><br><i>(N=85)</i>  |                           | <i>M6</i><br><i>(N=87)</i>  |                           | <i>M0</i><br><i>(N=97)</i>  |                           | <i>M3</i><br><i>(N=85)</i>  |                           | <i>M6</i><br><i>(N=87)</i>  |                           |
| GRIX                        | <i>Spearman's</i><br>$\rho$ | <i>p-</i><br><i>value</i> | <i>Spearman's</i><br>$\rho$ | <i>p-</i><br><i>value</i> | <i>Spearman's</i><br>$\rho$ | <i>p-</i><br><i>value</i> | <i>Spearman's</i><br>$\rho$ | <i>p-</i><br><i>value</i> | <i>Spearman's</i><br>$\rho$ | <i>p-</i><br><i>value</i> | <i>Spearman's</i><br>$\rho$ | <i>p-</i><br><i>value</i> |
| Xerostomia during day       | 0.081                       | 0.428                     | -0.071                      | 0.513                     | -0.056                      | 0.605                     | 0.103                       | 0.307                     | 0.060                       | 0.584                     | 0.022                       | 0.843                     |
| Xerostomia during night     | 0.115                       | 0.257                     | 0.095                       | 0.374                     | -0.036                      | 0.734                     | 0.190                       | 0.058                     | 0.155                       | 0.145                     | 0.042                       | 0.691                     |
| Xerostomia total score      | 0.098                       | 0.341                     | 0.025                       | 0.820                     | -0.077                      | 0.476                     | 0.137                       | 0.180                     | 0.124                       | 0.257                     | 0.027                       | 0.805                     |
| Sticky saliva during day    | 0.082                       | 0.420                     | 0.059                       | 0.584                     | -0.048                      | 0.652                     | 0.185                       | 0.064                     | 0.149                       | 0.161                     | 0.080                       | 0.453                     |
| Sticky saliva during night  | 0.103                       | 0.307                     | -0.101                      | 0.342                     | -0.066                      | 0.529                     | 0.244                       | 0.014*                    | 0.046                       | 0.665                     | -0.001                      | 0.990                     |
| Sticking saliva total score | 0.075                       | 0.459                     | -0.009                      | 0.931                     | -0.107                      | 0.315                     | 0.212                       | 0.034*                    | 0.109                       | 0.306                     | 0.008                       | 0.941                     |

\*: $p \leq 0.05$ ; M0: before treatment, M3: 3 months after treatment, M6: 6 months after treatment

**Appendix 7.** Spearman correlation coefficients of salivary flow versus the EORTC QLQ-H&N35

| <b>Total salivary flow<br/>EORTC QLQ-H&amp;N35</b> | <b>M0<br/>(N=45)</b> |                | <b>M3<br/>(N=68)</b> |                | <b>M6<br/>(N=59)</b> |                |
|----------------------------------------------------|----------------------|----------------|----------------------|----------------|----------------------|----------------|
|                                                    | <i>Spearman's ρ</i>  | <i>p-value</i> | <i>Spearman's ρ</i>  | <i>p-value</i> | <i>Spearman's ρ</i>  | <i>p-value</i> |
| Pain in mouth                                      | -0.100               | 0.503          | -0.171               | 0.153          | -0.048               | 0.718          |
| Swallowing                                         | -0.050               | 0.737          | -0.167               | 0.164          | 0.073                | 0.579          |
| Senses problems                                    | -0.450               | 0.002*         | -0.272               | 0.022*         | -0.287               | 0.026*         |
| Speech problems                                    | 0.037                | 0.803          | 0.057                | 0.635          | 0.168                | 0.199          |
| Trouble with social eating                         | -0.051               | 0.735          | -0.292               | 0.014*         | -0.238               | 0.067          |
| Trouble with social contact                        | -0.179               | 0.228          | -0.102               | 0.397          | -0.008               | 0.950          |
| Less sexuality                                     | -0.024               | 0.875          | -0.008               | 0.950          | -0.181               | 0.171          |
| Teeth                                              | 0.042                | 0.778          | -0.034               | 0.775          | -0.091               | 0.493          |
| Opening mouth                                      | -0.188               | 0.207          | -0.174               | 0.146          | 0.093                | 0.479          |
| Dry mouth                                          | -0.227               | 0.126          | -0.339               | 0.004*         | -0.279               | 0.031*         |
| Sticky saliva                                      | -0.217               | 0.143          | -0.321               | 0.006*         | -0.350               | 0.006*         |
| Coughing                                           | -0.300               | 0.040*         | -0.022               | 0.853          | -0.074               | 0.572          |
| Feeling ill                                        | -0.125               | 0.403          | 0.024                | 0.843          | 0.124                | 0.351          |
| Pain killers                                       | 0.011                | 0.940          | 0.056                | 0.645          | -0.133               | 0.310          |
| Nutritional supplements                            | -0.390               | 0.007*         | -0.314               | 0.008*         | -0.162               | 0.215          |
| Feeding tube                                       | -0.196               | 0.187          | -0.189               | 0.114          | NA                   | NA             |
| Weight loss                                        | -0.038               | 0.805          | -0.105               | 0.384          | -0.267               | 0.041*         |
| Weight gain                                        | -0.185               | 0.219          | 0.059                | 0.627          | -0.127               | 0.335          |

\*:  $p \leq 0.05$ ; M0: before treatment, M3: 3 months after treatment, M6: 6 months after treatment



**Appendix 8.** Spearman correlation coefficients of salivary flow versus the SWAL-QoL-NL

| <b>Total salivary<br/>flow</b> | <b>M0</b>           |                | <b>M3</b>           |                | <b>M6</b>           |                |
|--------------------------------|---------------------|----------------|---------------------|----------------|---------------------|----------------|
|                                | <b>(N=45)</b>       |                | <b>(N=71)</b>       |                | <b>(N=57)</b>       |                |
| <b>SWAL-QoL-NL</b>             | <i>Spearman's ρ</i> | <i>p-value</i> | <i>Spearman's ρ</i> | <i>p-value</i> | <i>Spearman's ρ</i> | <i>p-value</i> |
| General burden                 | -0.145              | 0.347          | -0.146              | 0.220          | -0.032              | 0.810          |
| Food selection                 | -0.147              | 0.337          | -0.219              | 0.065          | -0.312              | 0.015*         |
| Eating duration                | -0.218              | 0.150          | -0.337              | 0.004*         | -0.122              | 0.354          |
| Eating desire                  | -0.182              | 0.231          | -0.393              | 0.001*         | -0.202              | 0.121          |
| Fear of eating                 | -0.239              | 0.114          | -0.148              | 0.218          | -0.146              | 0.266          |
| Mental health                  | -0.126              | 0.414          | -0.273              | 0.021*         | -0.235              | 0.070          |
| Social functioning             | -0.148              | 0.342          | -0.322              | 0.006*         | -0.224              | 0.086          |
| Symptoms                       | -0.155              | 0.314          | -0.194              | 0.105          | -0.157              | 0.231          |
| <b>Total score</b>             | -0.218              | 0.156          | -0.338              | 0.004*         | -0.245              | 0.059          |

\*:  $p \leq 0.05$ ; M0: before treatment, M3: 3 months after treatment, M6: 6 months after treatment

**Appendix 9.** Spearman correlation coefficients of salivary flow versus the GRIX

| <b>Total salivary flow</b>  | <b>M0</b>     |        | <b>M3</b>     |        | <b>M6</b>     |        |
|-----------------------------|---------------|--------|---------------|--------|---------------|--------|
| <b>GRIX</b>                 | <b>(N=45)</b> |        | <b>(N=65)</b> |        | <b>(N=57)</b> |        |
| Xerostomia during day       | -0.254        | 0.092  | -0.332        | 0.006* | -0.441        | 0.001* |
| Xerostomia during night     | -0.147        | 0.329  | -0.225        | 0.063  | -0.099        | 0.450  |
| Xerostomia total score      | -0.182        | 0.232  | -0.327        | 0.008* | -0.320        | 0.015* |
| Sticky saliva during day    | -0.218        | 0.151  | -0.282        | 0.019* | -0.348        | 0.006* |
| Sticky saliva during night  | -0.299        | 0.044* | -0.192        | 0.115  | -0.128        | 0.331  |
| Sticking saliva total score | -0.271        | 0.072  | -0.274        | 0.023* | -0.256        | 0.048* |

\*:  $p \leq 0.05$ ; M0: before treatment, M3: 3 months after treatment, M6: 6 months after treatment
